# Supplementary material for: B cell receptor-induced IL-10 production from neonatal mouse CD19+CD43- cells depends on STAT5-mediated IL-6 secretion
Source: eLife journal article supplement (doi:10.7554/elife.83561), 2023-02-02
Supplement: supp [file elife-83561-supp-v1.zip]

|                               |                |  | <u>IL-21</u> |    |    |    |     | <u>anti-IgM</u> |    |    |     |
|-------------------------------|----------------|--|--------------|----|----|----|-----|-----------------|----|----|-----|
|                               | [min]          |  | 0            | 15 | 30 | 60 | 120 | 15              | 30 | 60 | 120 |
| P-STAT1 (Tyr <sup>701</sup> ) | Short exposure |  |              |    |    |    |     |                 |    |    |     |
|                               | Long exposure  |  |              |    |    |    |     |                 |    |    |     |
| Total STAT1                   |                |  |              |    |    |    |     |                 |    |    |     |
