# Supplementary material for: B cell receptor-induced IL-10 production from neonatal mouse CD19+CD43- cells depends on STAT5-mediated IL-6 secretion
Source: eLife journal article supplement (doi:10.7554/elife.83561), 2023-02-02

# Figure 4-figure supplement 1-source data 1

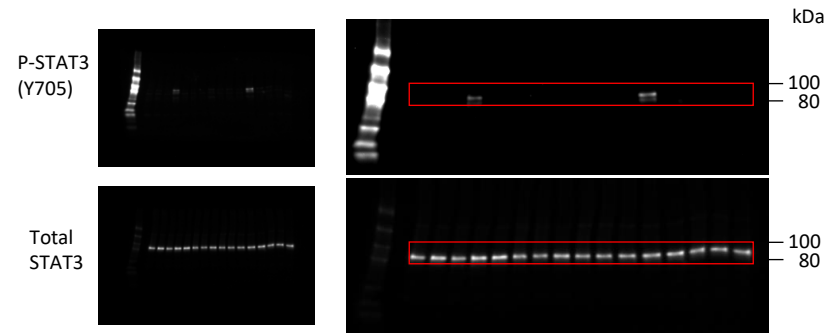

Supplement: supp [file elife-83561-supp-v1.zip]
