# Supplementary figures and images for: B cell receptor-induced IL-10 production from neonatal mouse CD19+CD43- cells depends on STAT5-mediated IL-6 secretion
Source: eLife journal article supplement (doi:10.7554/elife.83561), 2023-02-02

Figure 1-figure supplement 1

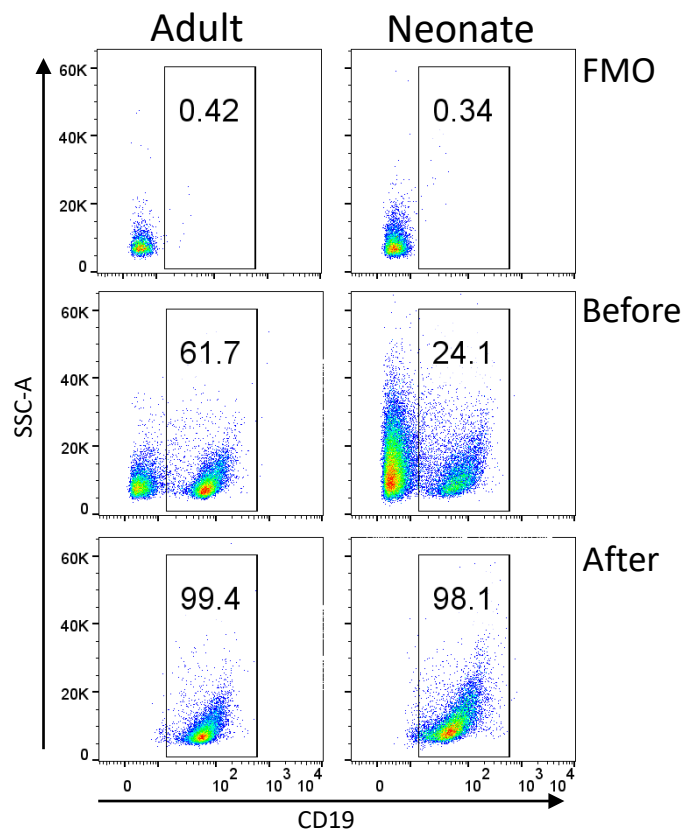

Supplement: supp [file elife-83561-supp-v1.zip]

Figure 2-figure supplement 1

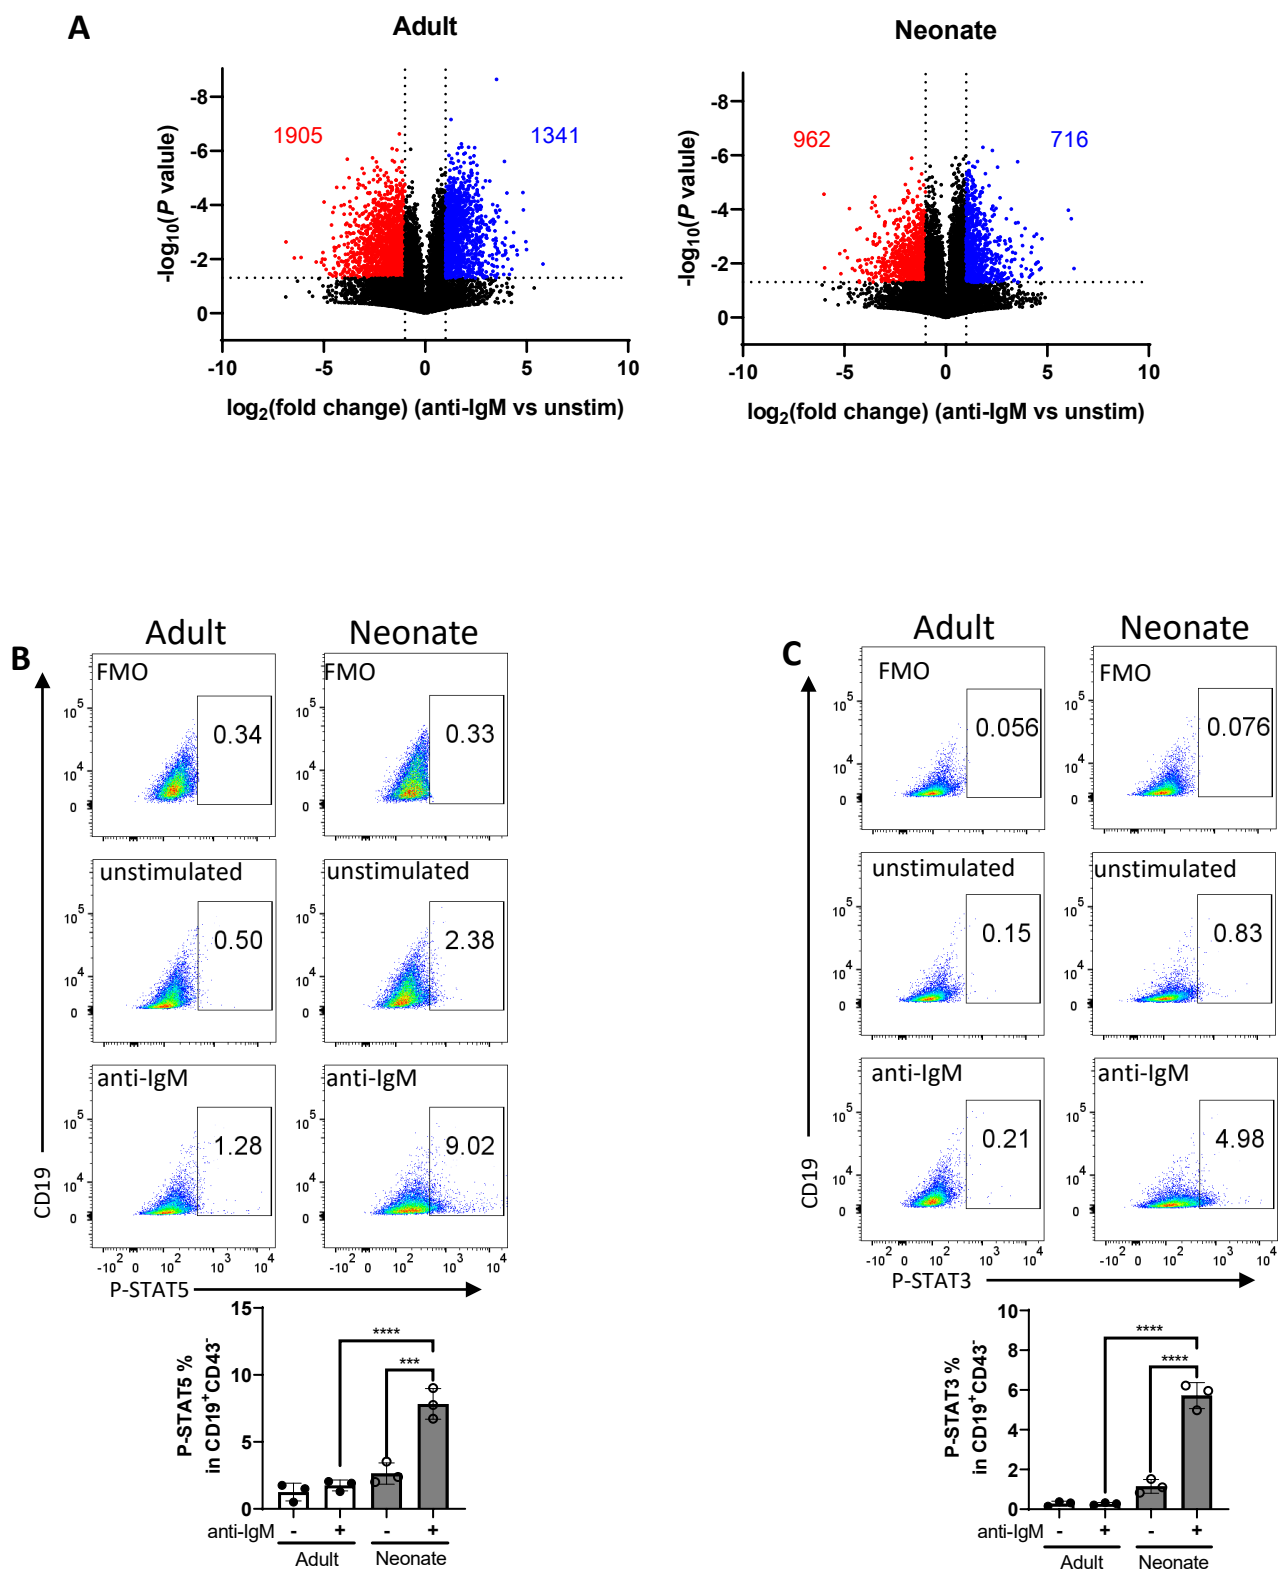

Supplement: supp [file elife-83561-supp-v1.zip]

Figure 5-figure supplement 2

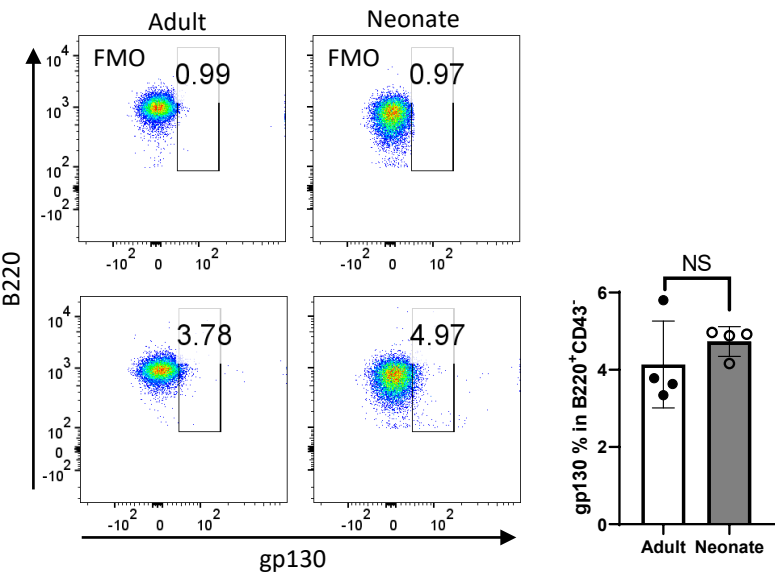

Supplement: supp [file elife-83561-supp-v1.zip]

Figure 6-figure supplement 3

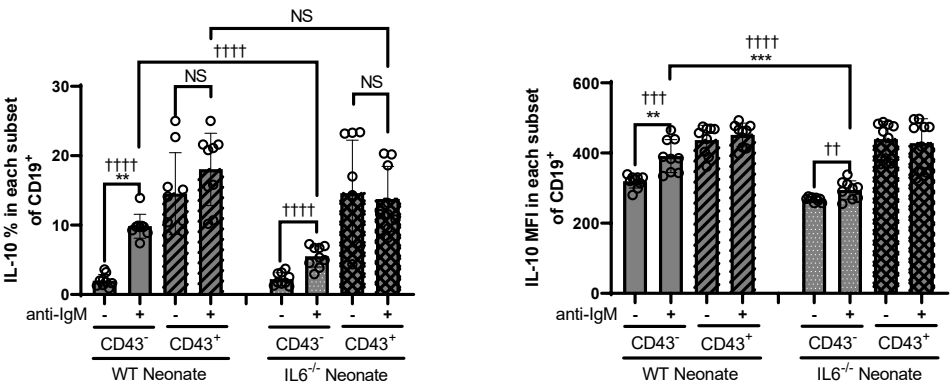

Supplement: supp [file elife-83561-supp-v1.zip]

Figure 5-figure supplement 1

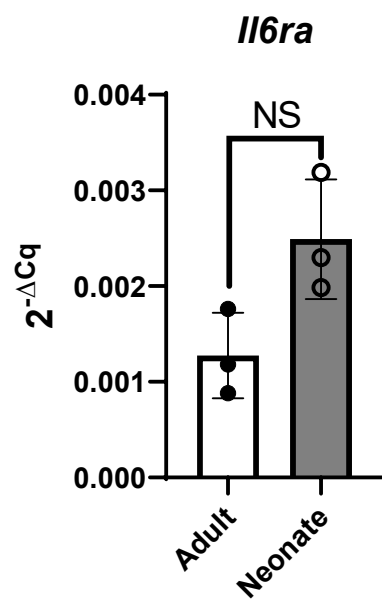

Supplement: supp [file elife-83561-supp-v1.zip]

Figure 4-figure supplement 2

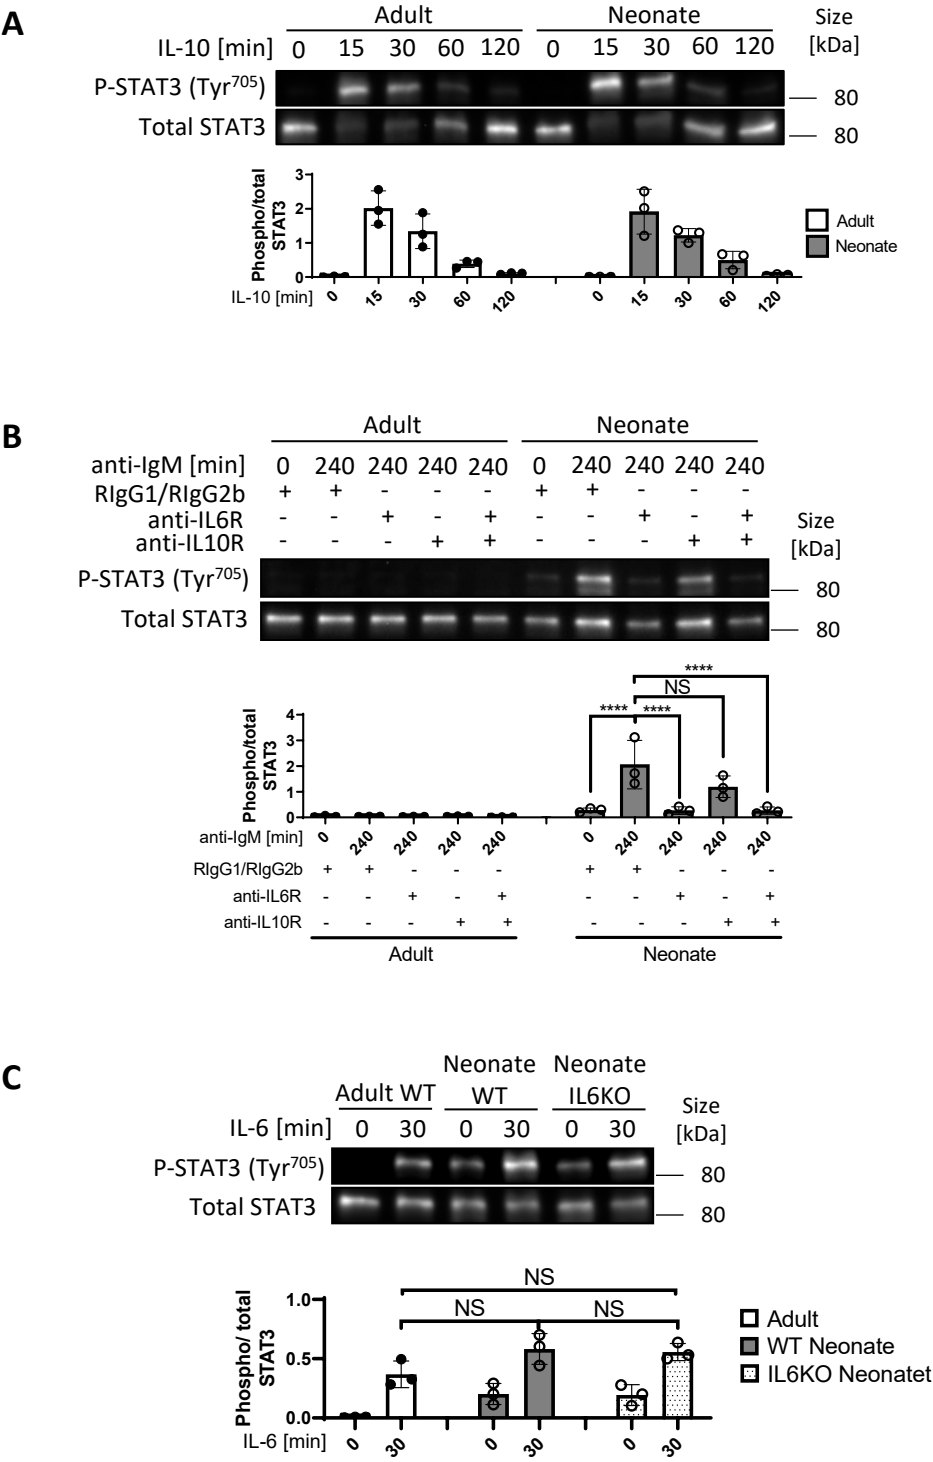

Supplement: supp [file elife-83561-supp-v1.zip]

Figure 4-figure supplement 3

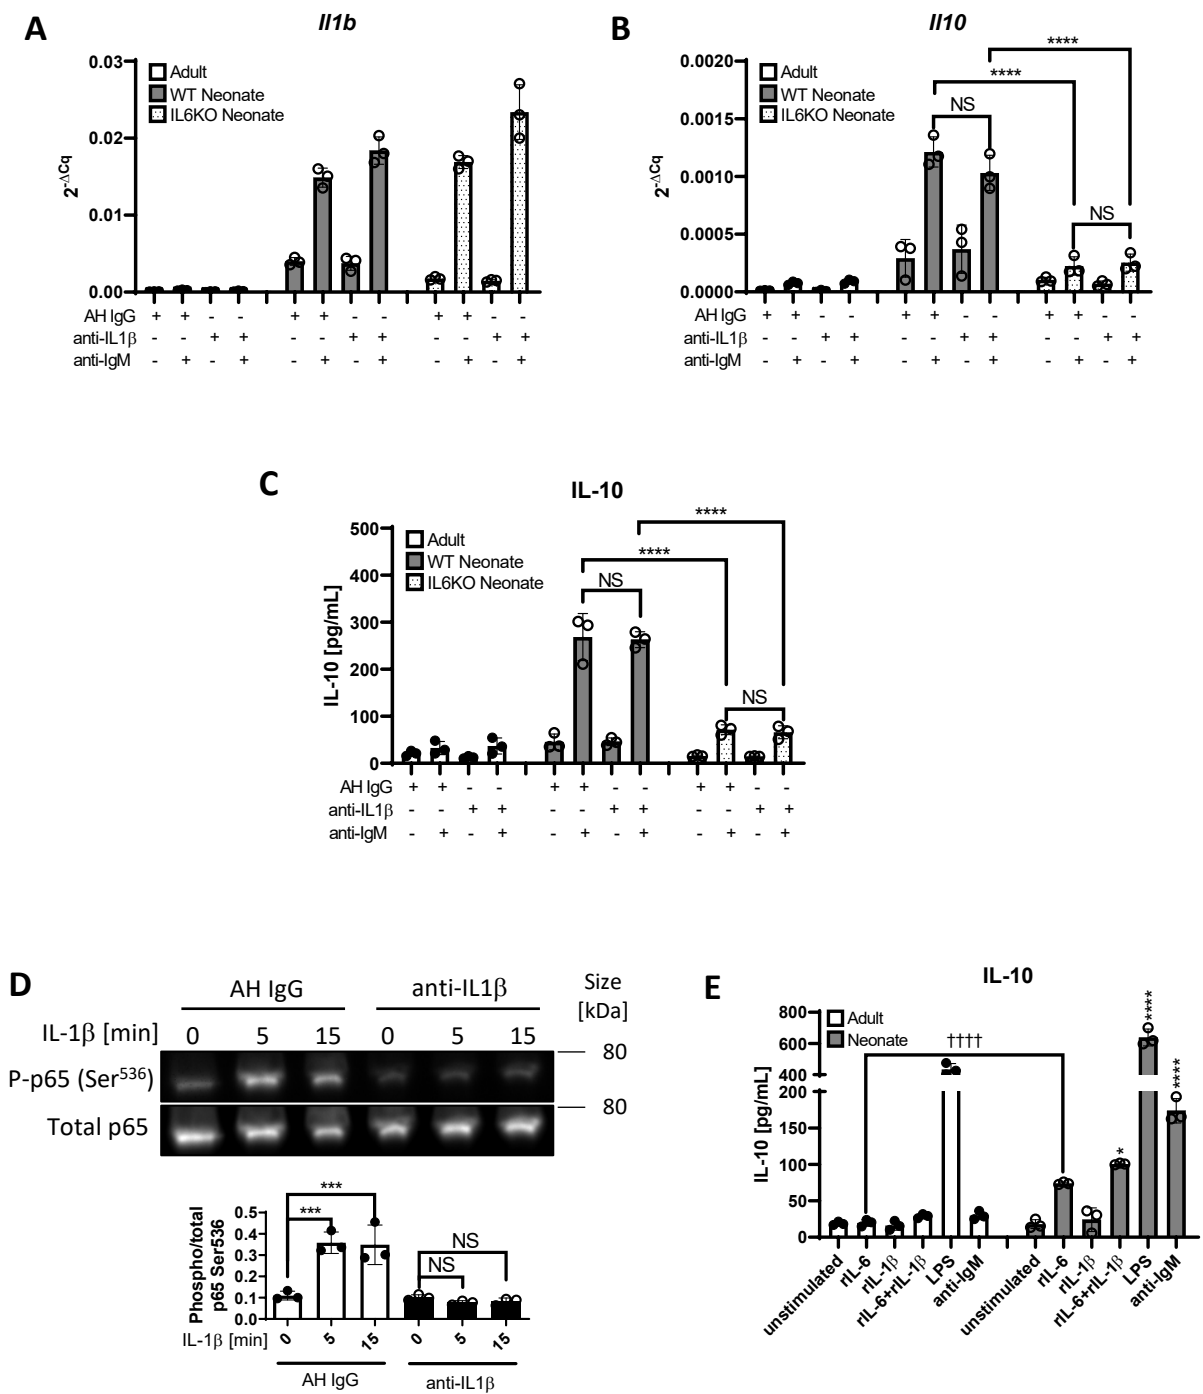

Supplement: supp [file elife-83561-supp-v1.zip]

Figure 7-figure supplement 2

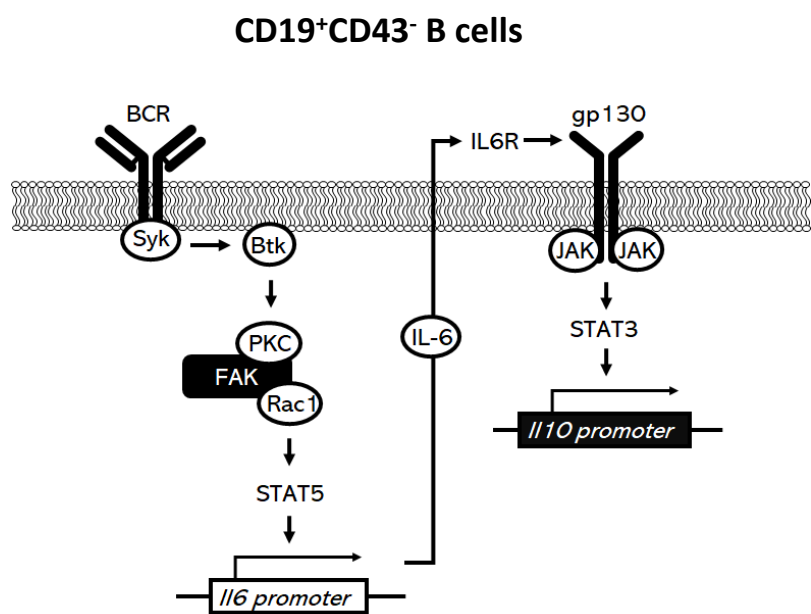

Supplement: supp [file elife-83561-supp-v1.zip]

Figure 1-figure supplement 9

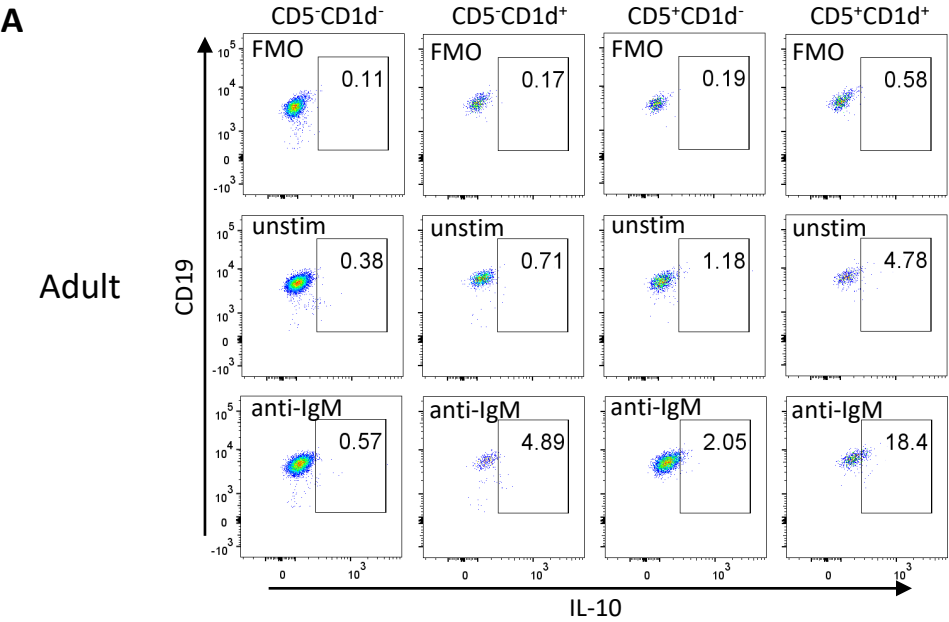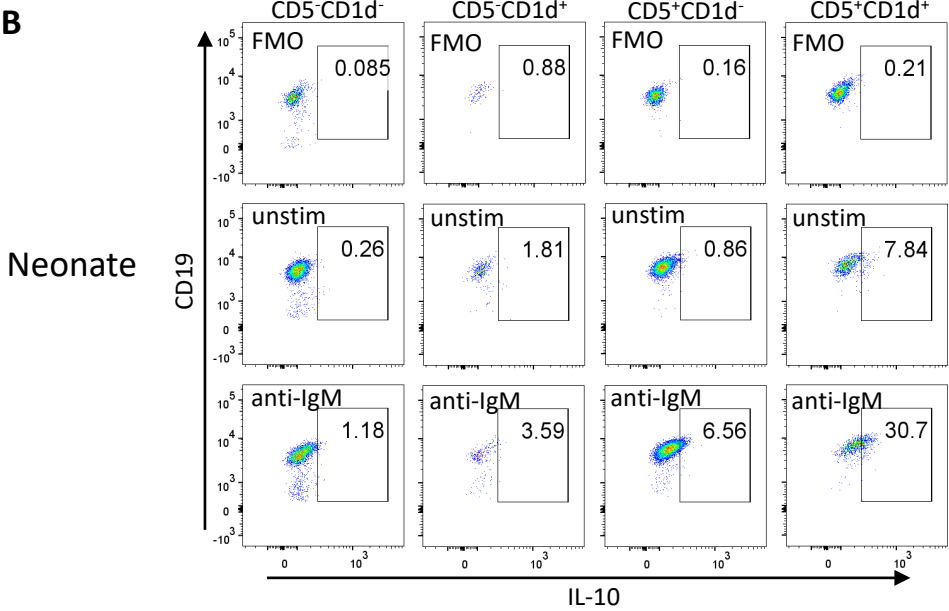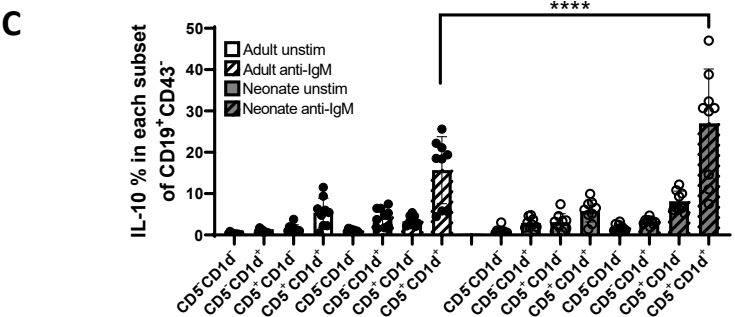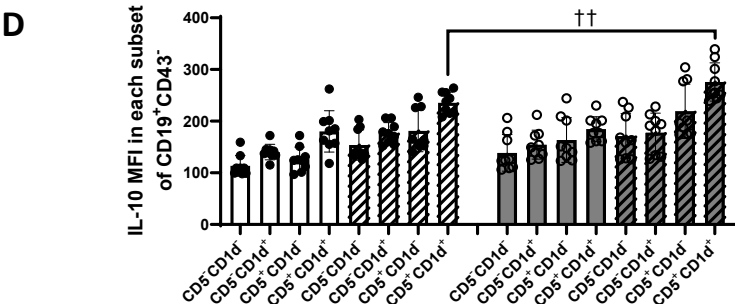

Supplement: supp [file elife-83561-supp-v1.zip]

Figure 6-figure supplement 1

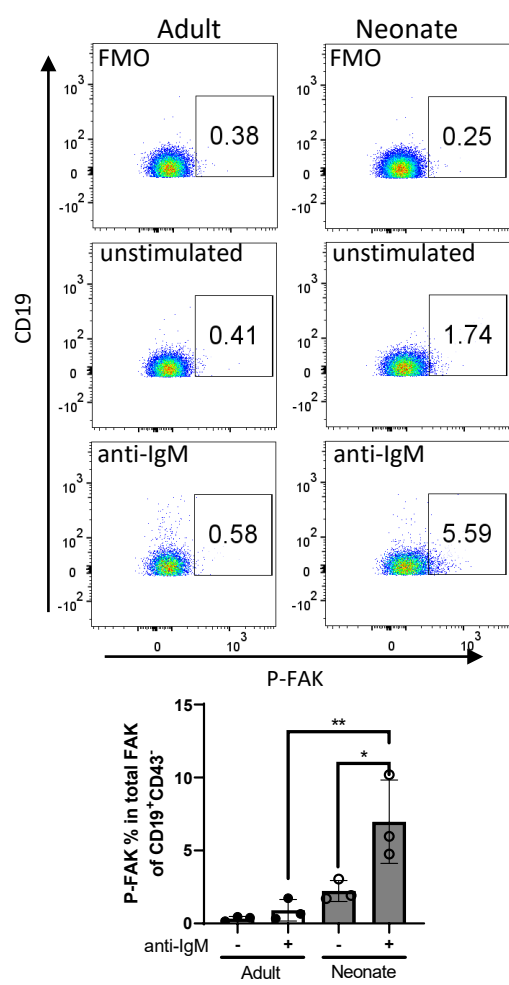

Supplement: supp [file elife-83561-supp-v1.zip]

**Figure 1-figure supplement 6**

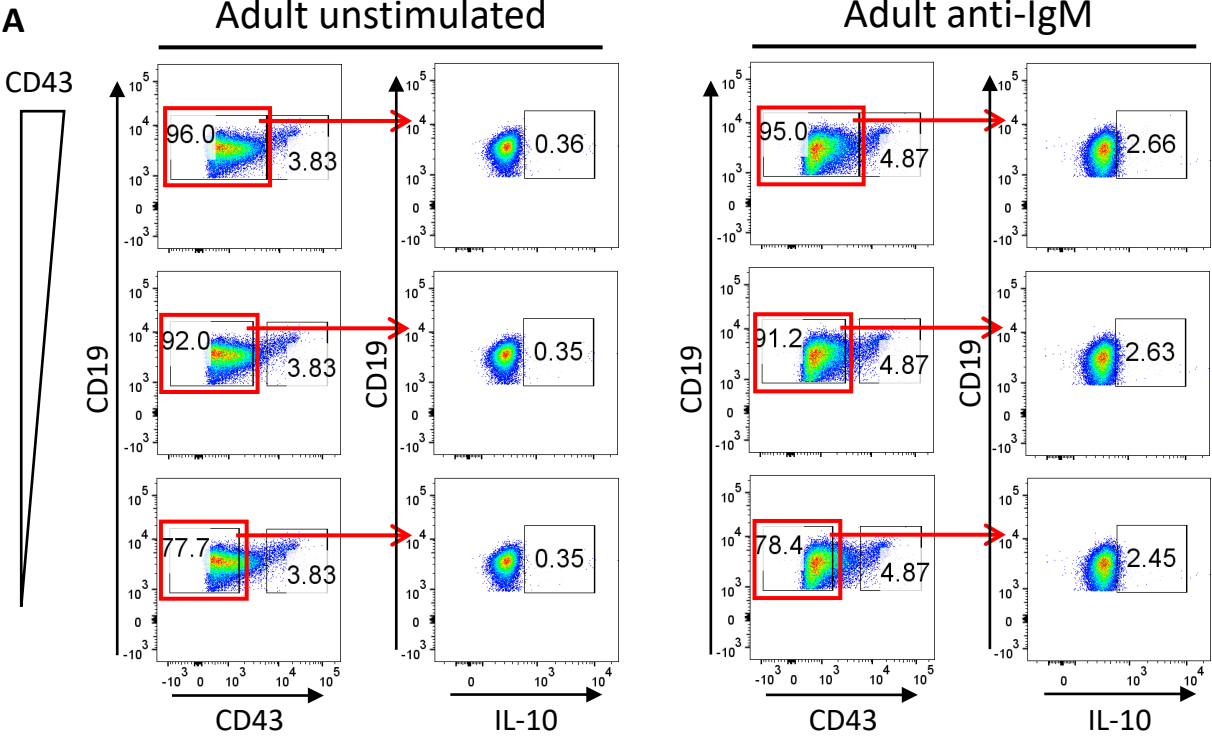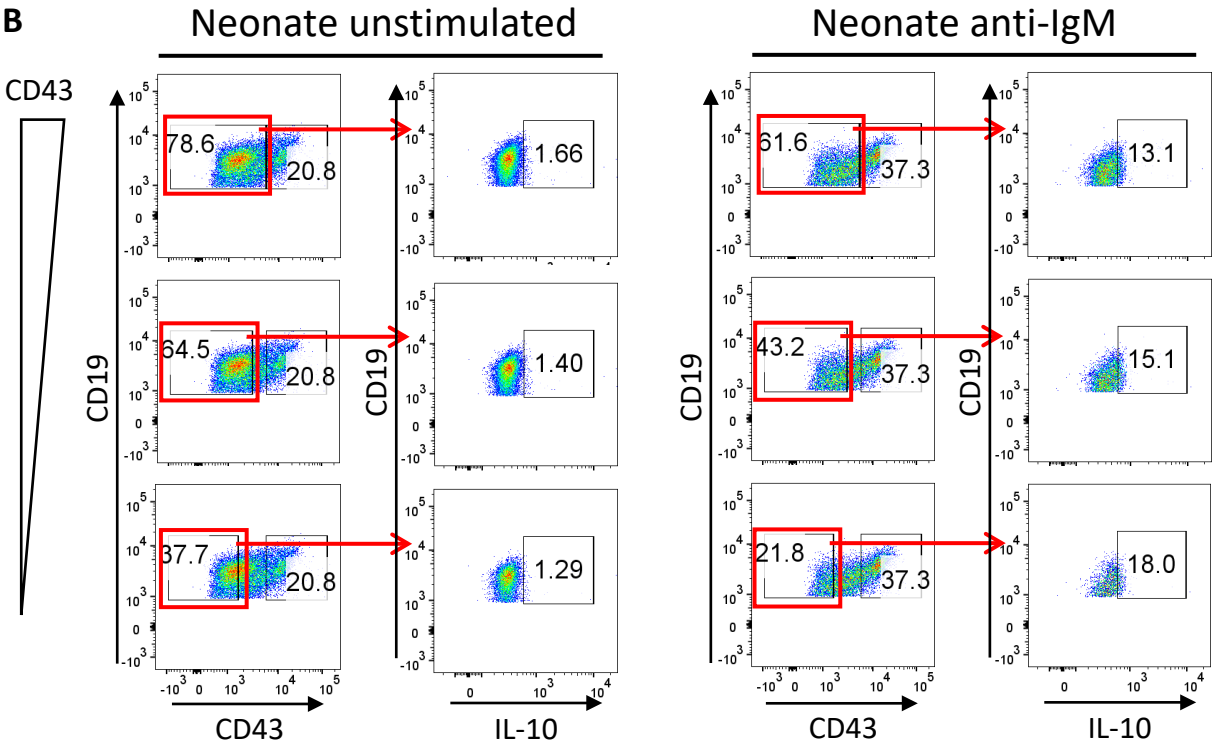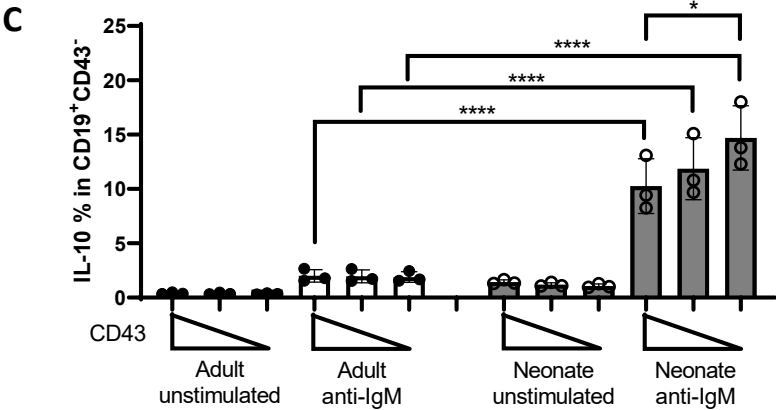

Supplement: supp [file elife-83561-supp-v1.zip]

Figure 4-figure supplement 1

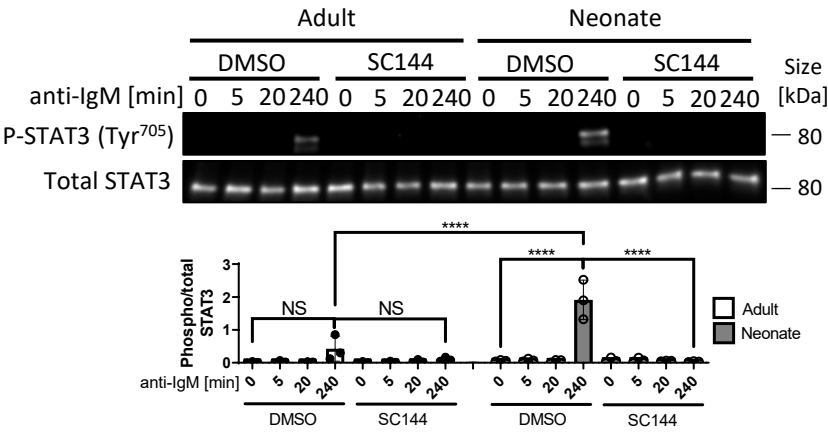

Supplement: supp [file elife-83561-supp-v1.zip]

Figure 4-figure supplement 4

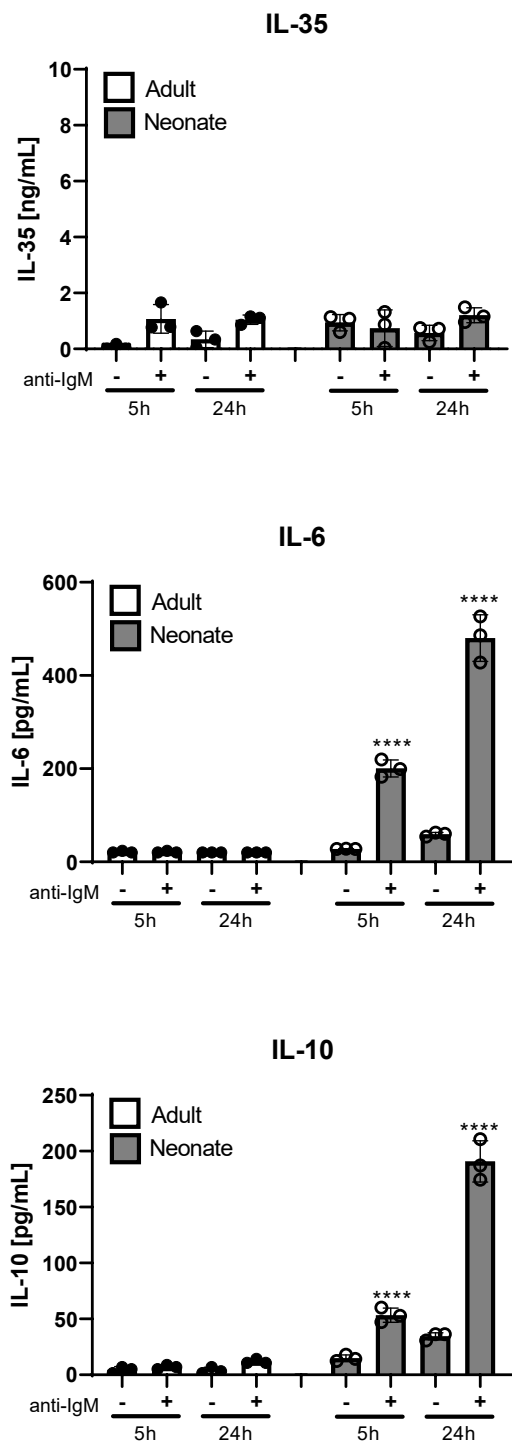

Supplement: supp [file elife-83561-supp-v1.zip]

Figure 1-figure supplement 7

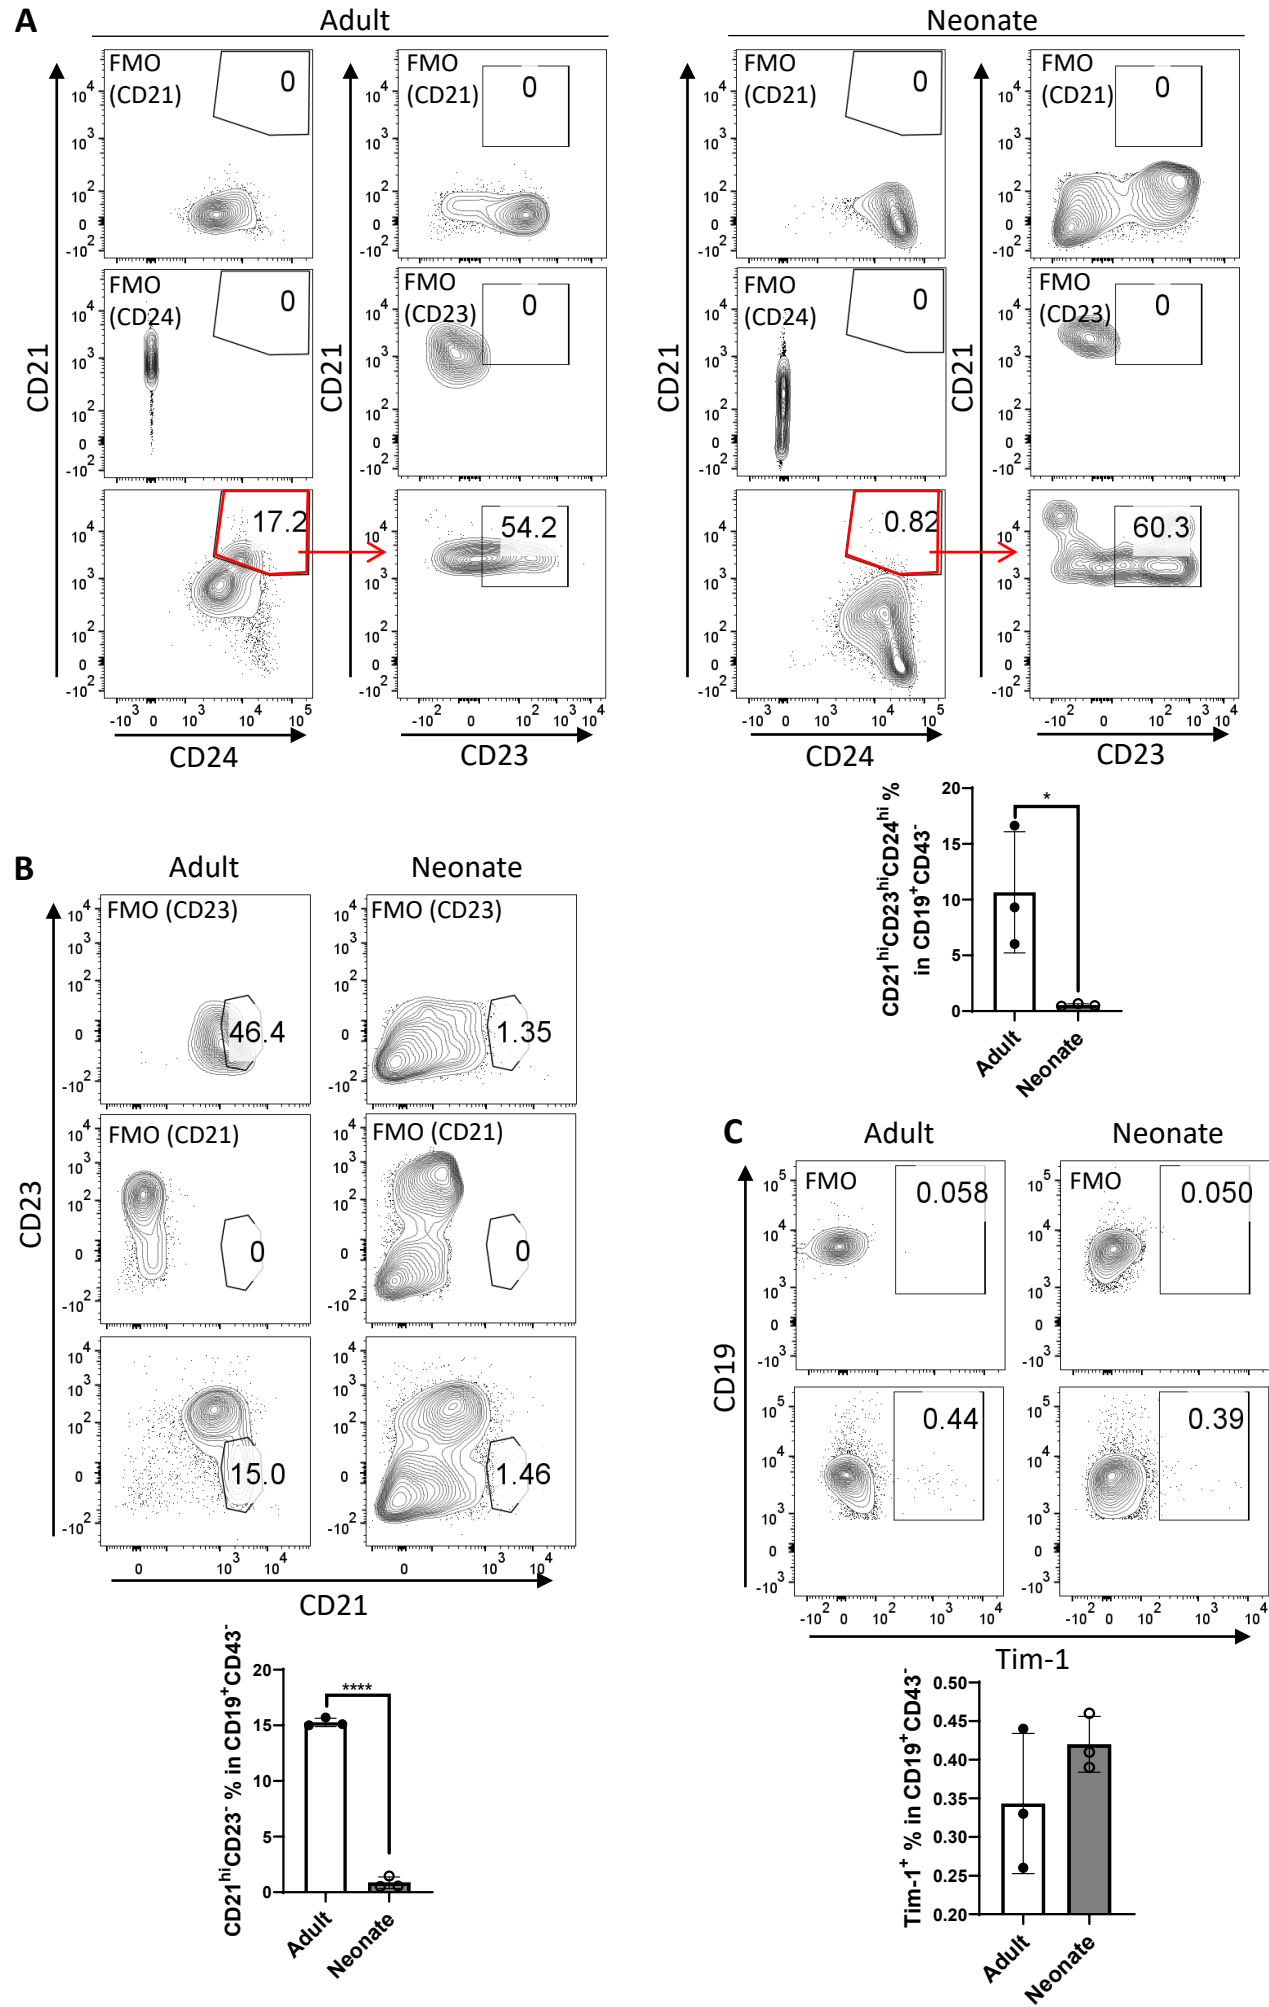

Supplement: supp [file elife-83561-supp-v1.zip]

Figure 1-figure supplement 5

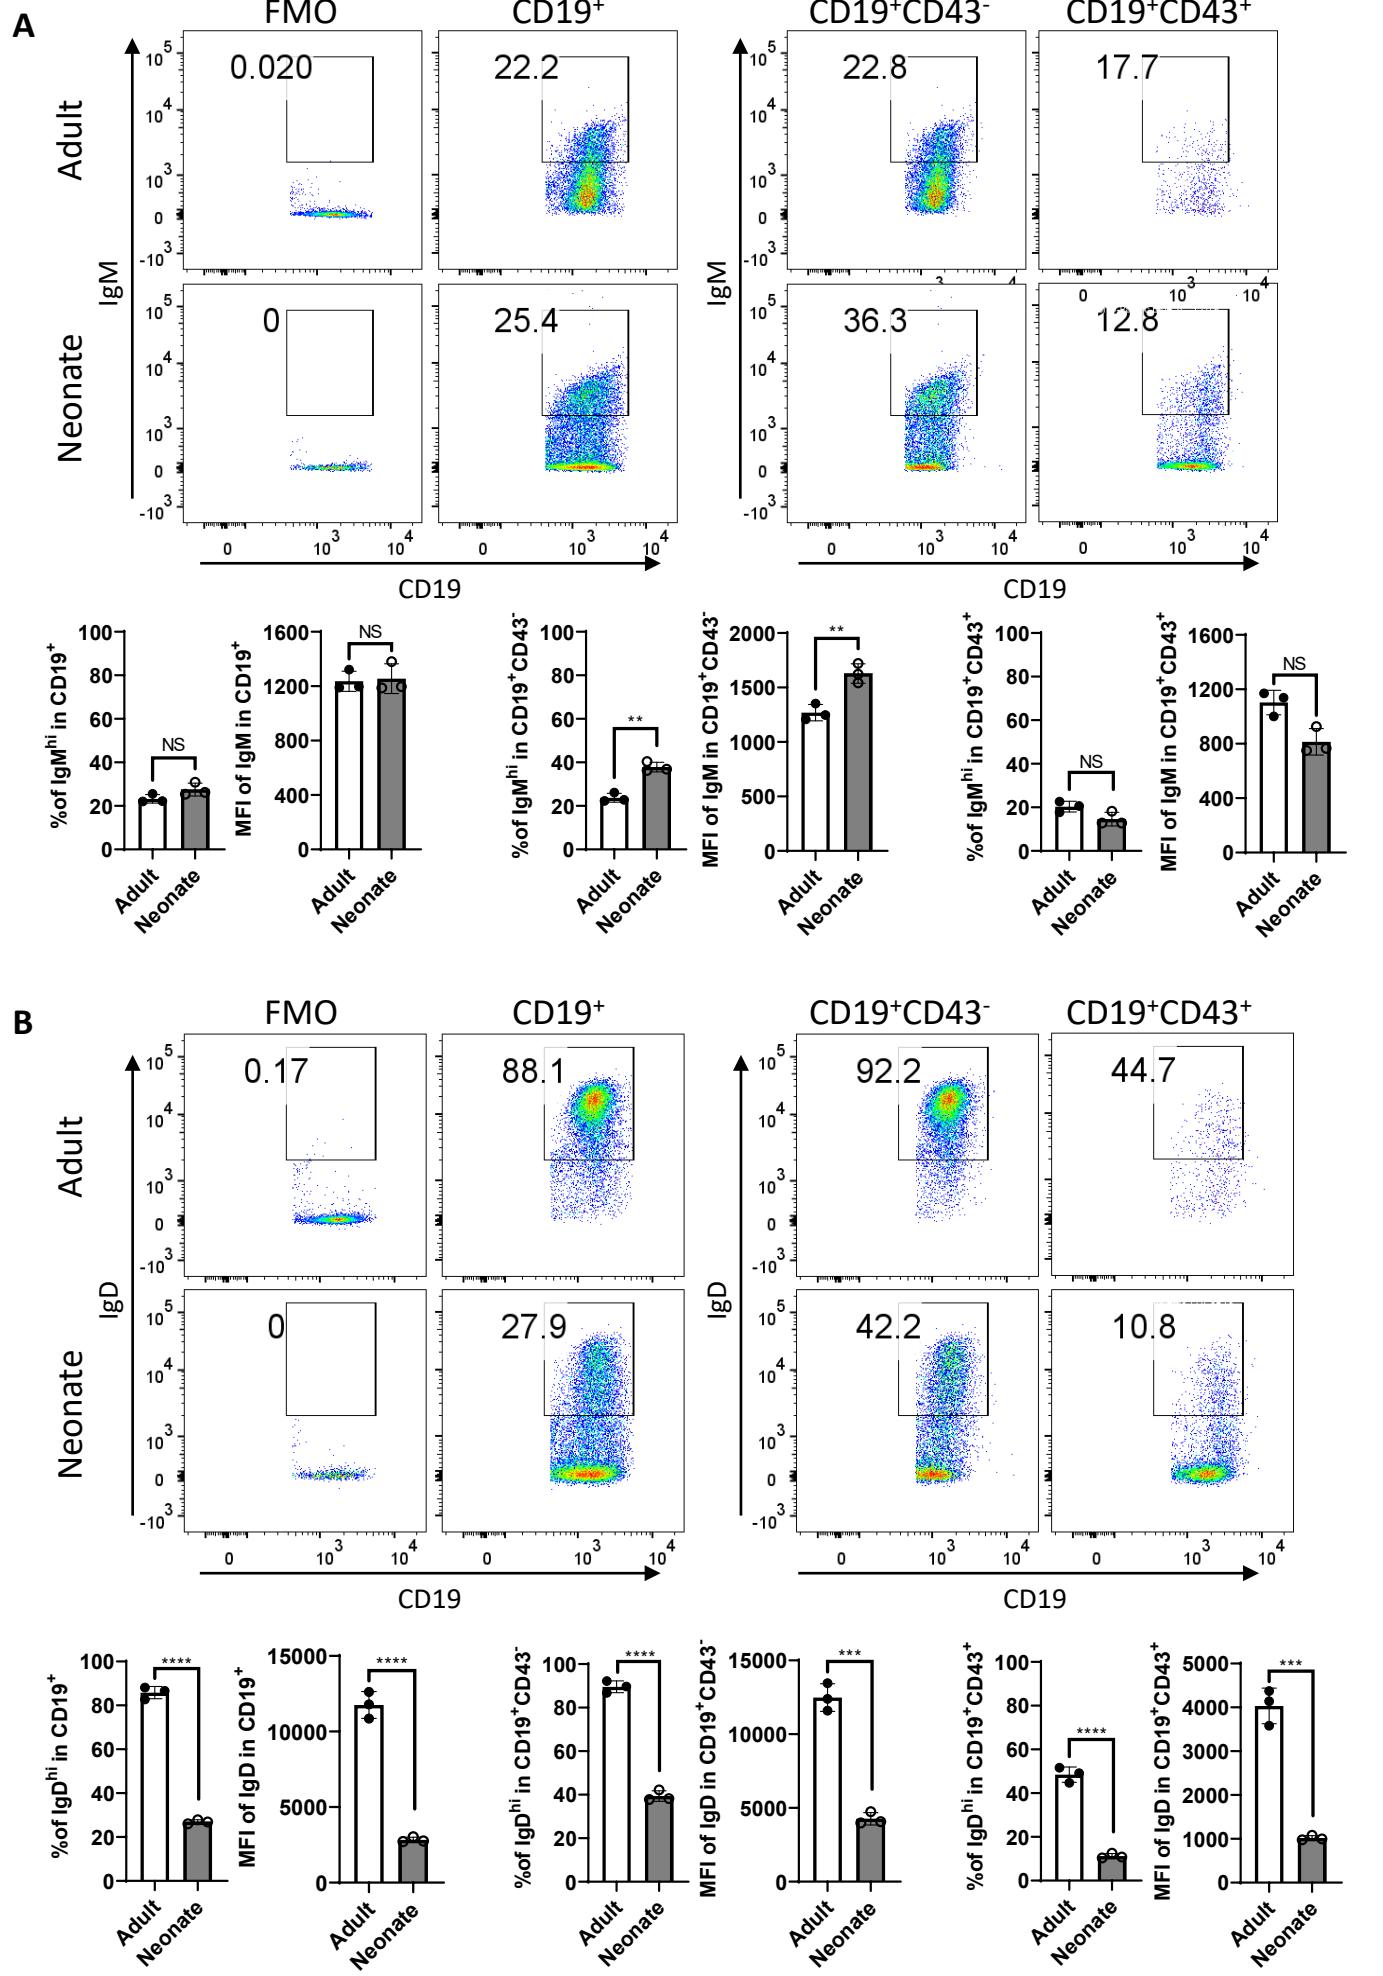

Supplement: supp [file elife-83561-supp-v1.zip]

Figure 6-figure supplement 2

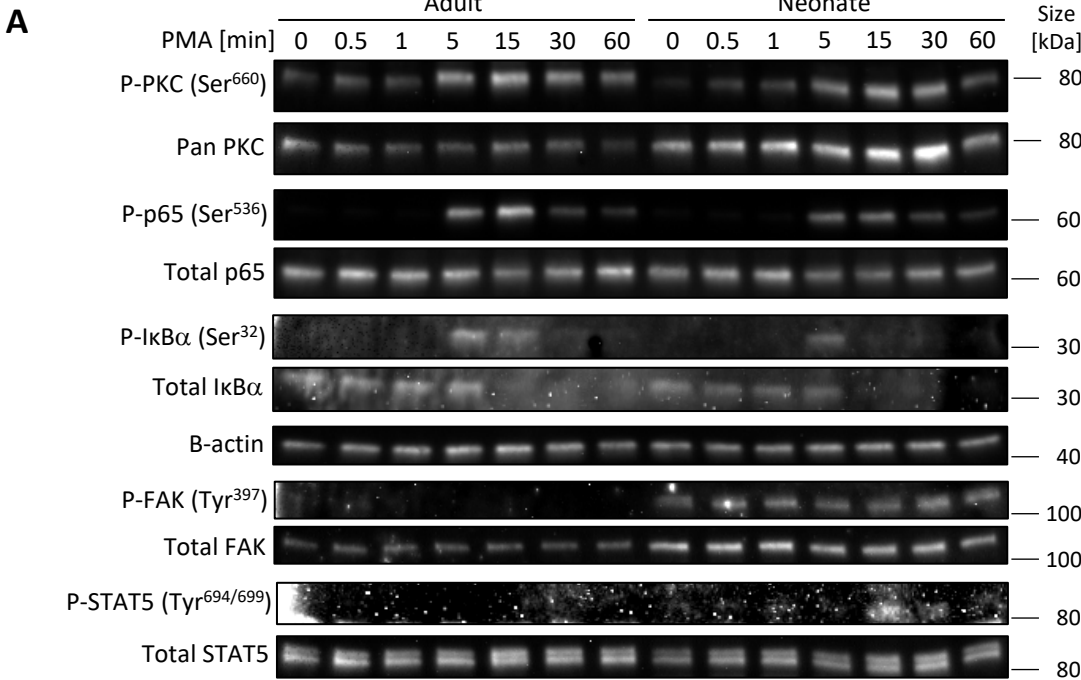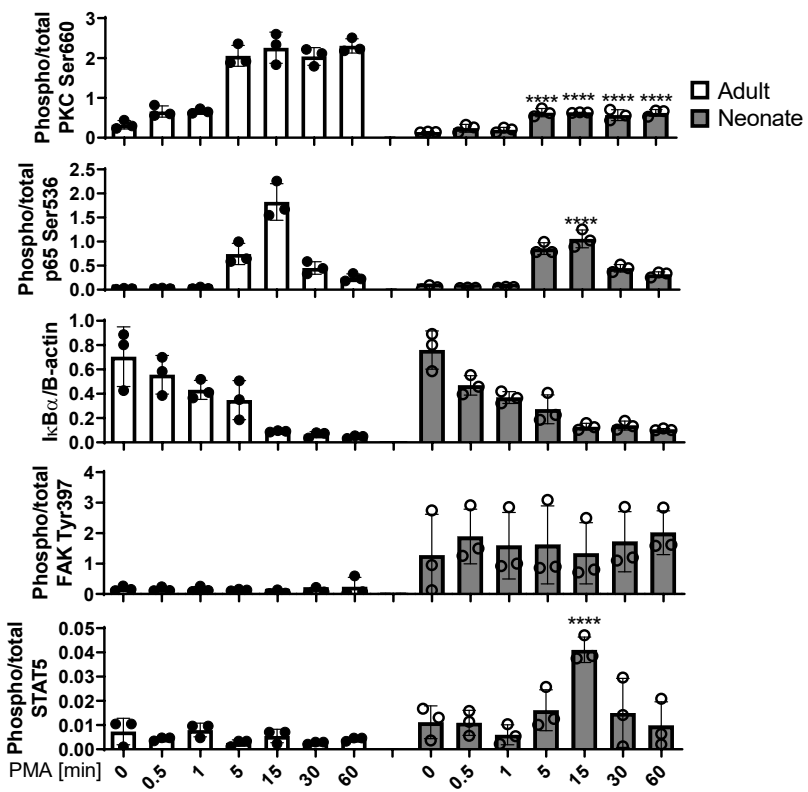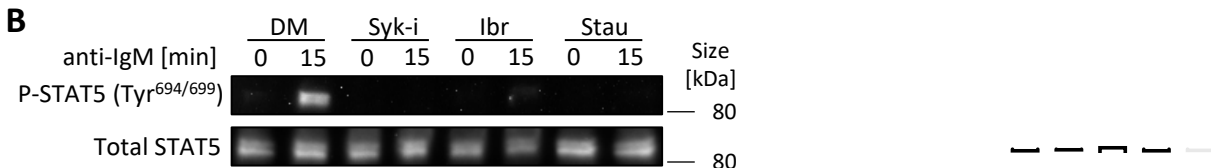

Supplement: supp [file elife-83561-supp-v1.zip]

Figure 5-figure supplement 3

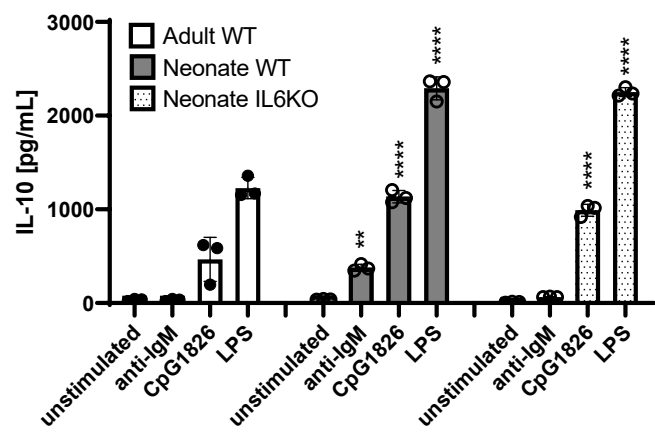

Supplement: supp [file elife-83561-supp-v1.zip]

Figure 7-figure supplement 1

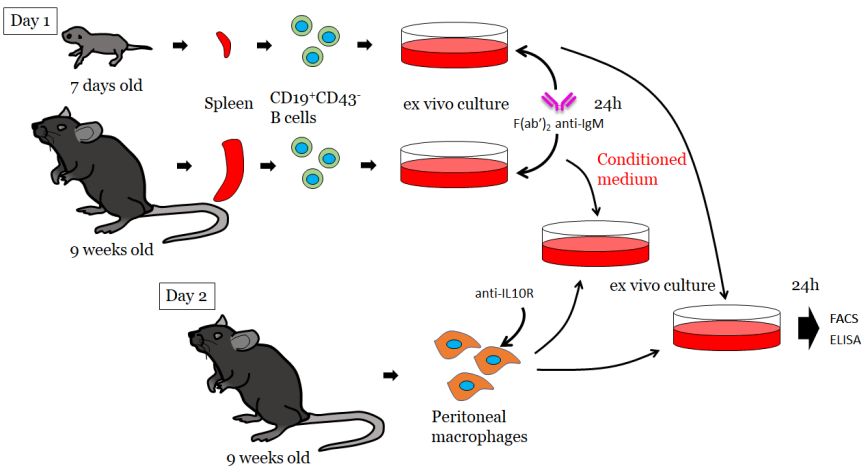

Supplement: supp [file elife-83561-supp-v1.zip]

Figure 1-figure supplement 4

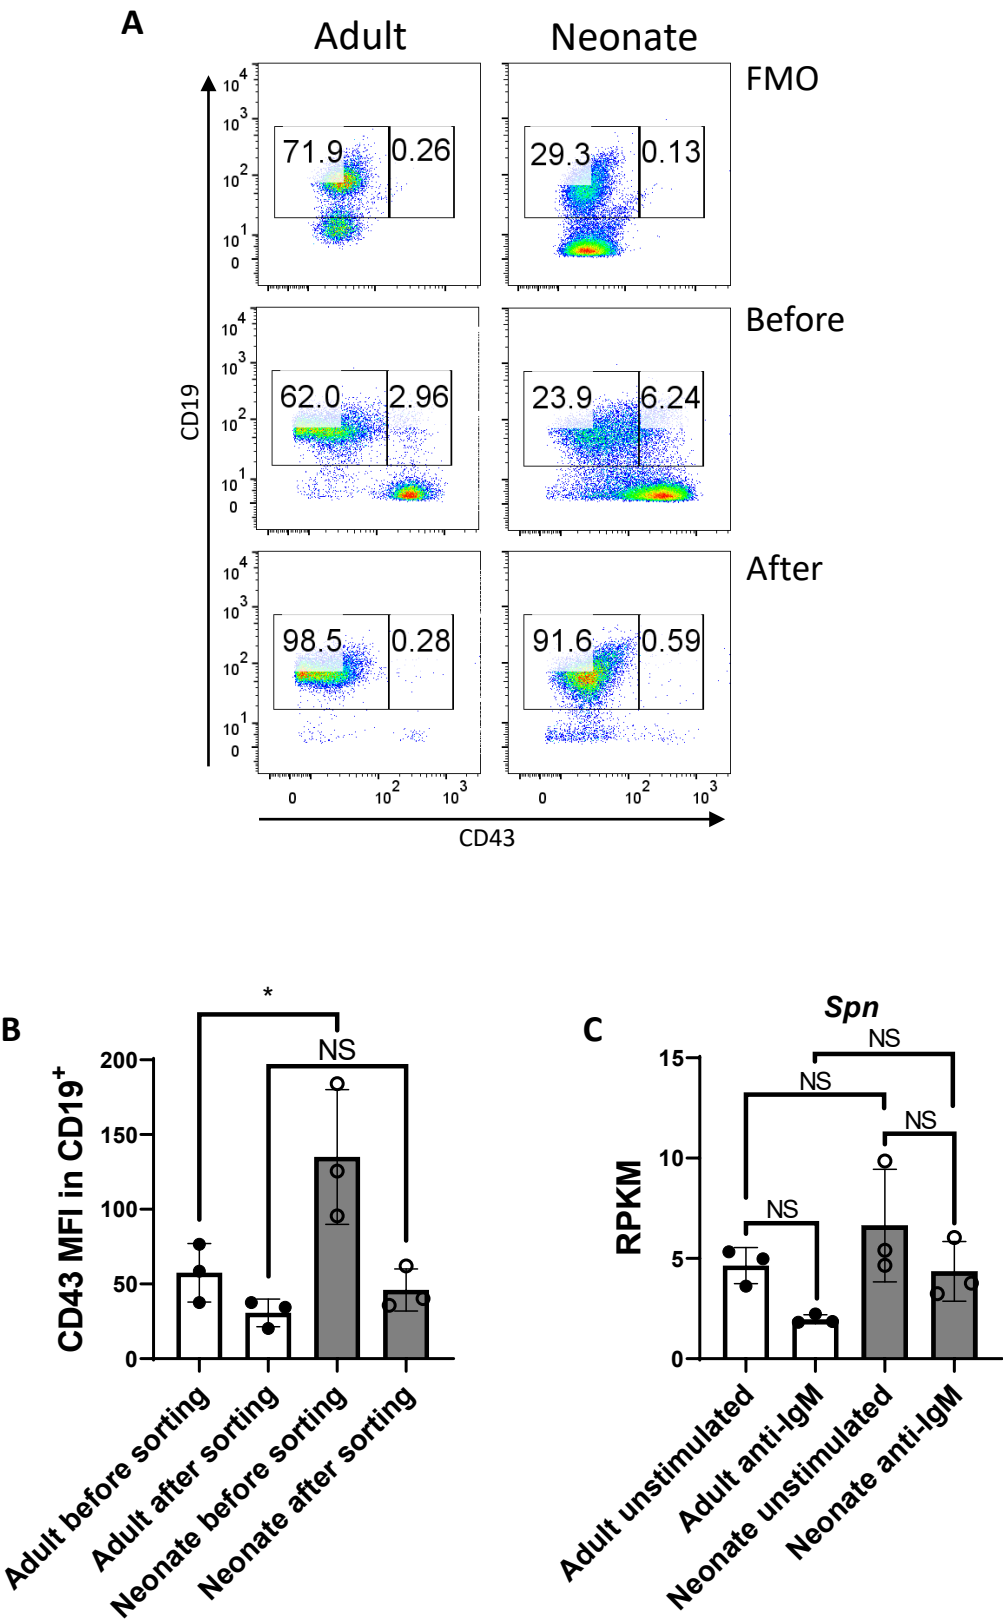

Supplement: supp [file elife-83561-supp-v1.zip]

Figure 2-figure supplement 3

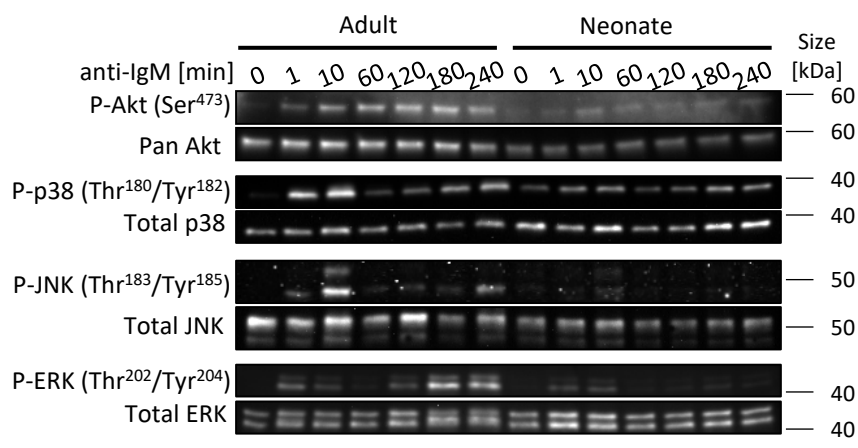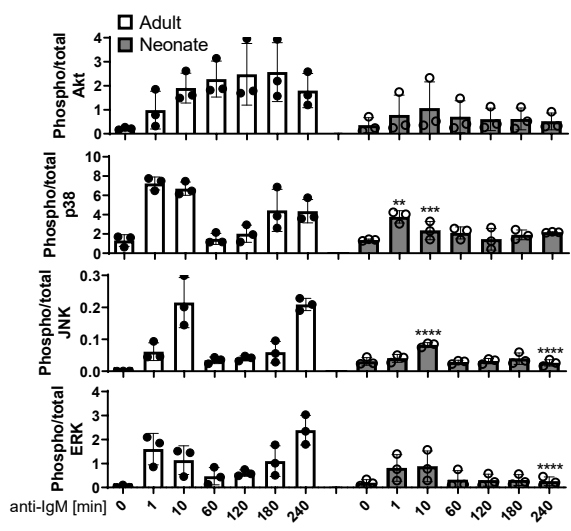

Supplement: supp [file elife-83561-supp-v1.zip]

Figure 1-figure supplement 3

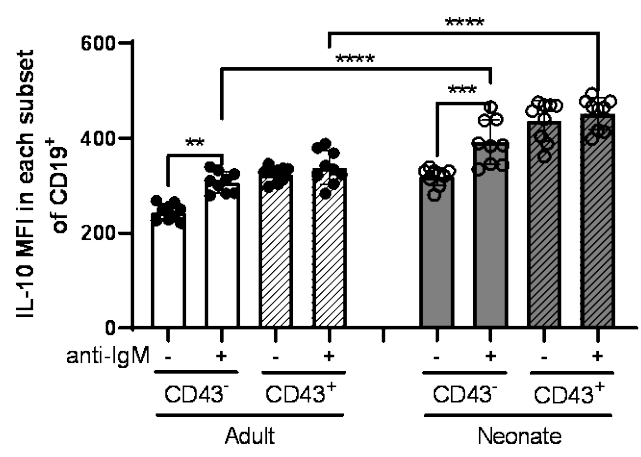

Supplement: supp [file elife-83561-supp-v1.zip]

Figure 1-figure supplement 8

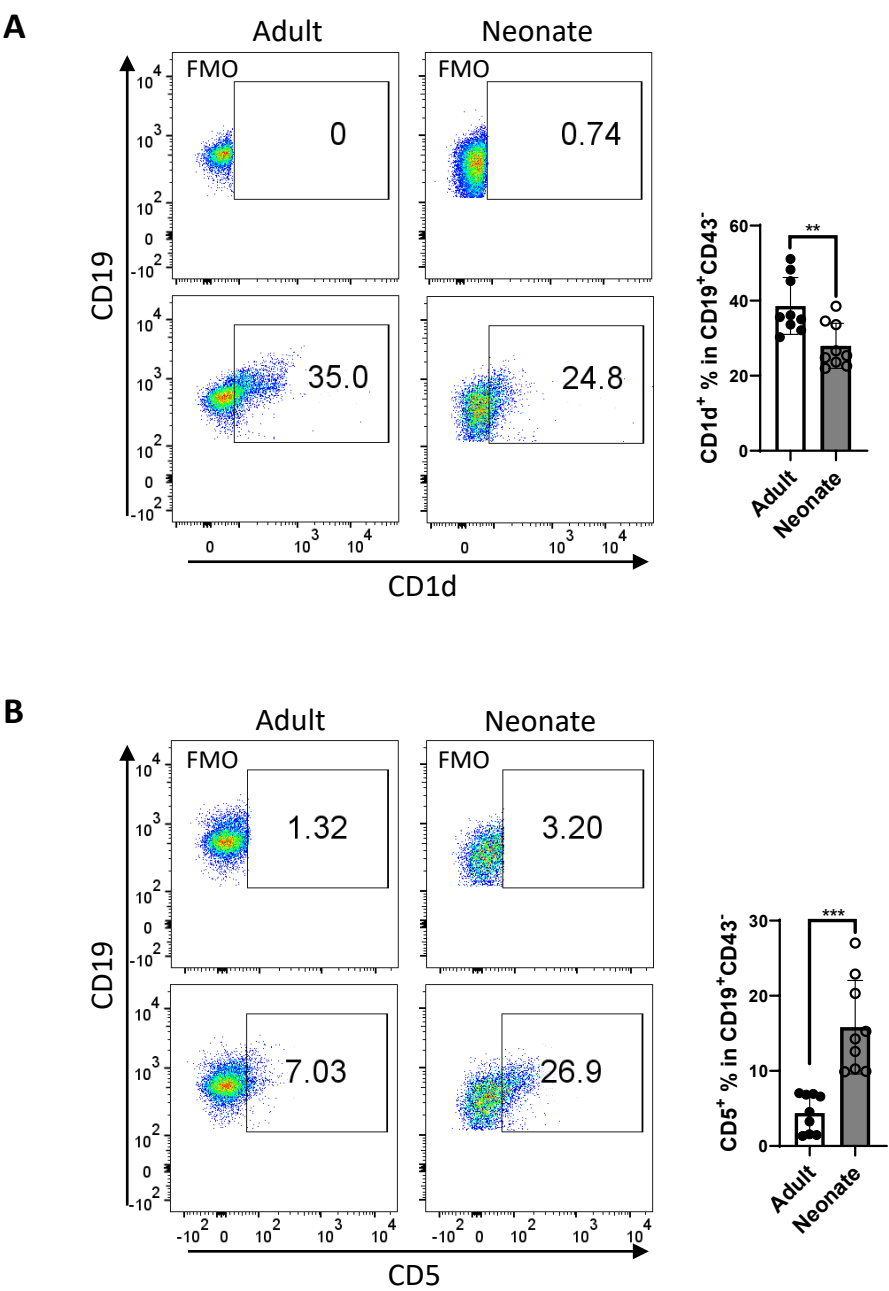

Supplement: supp [file elife-83561-supp-v1.zip]

Figure 1-figure supplement 2

A

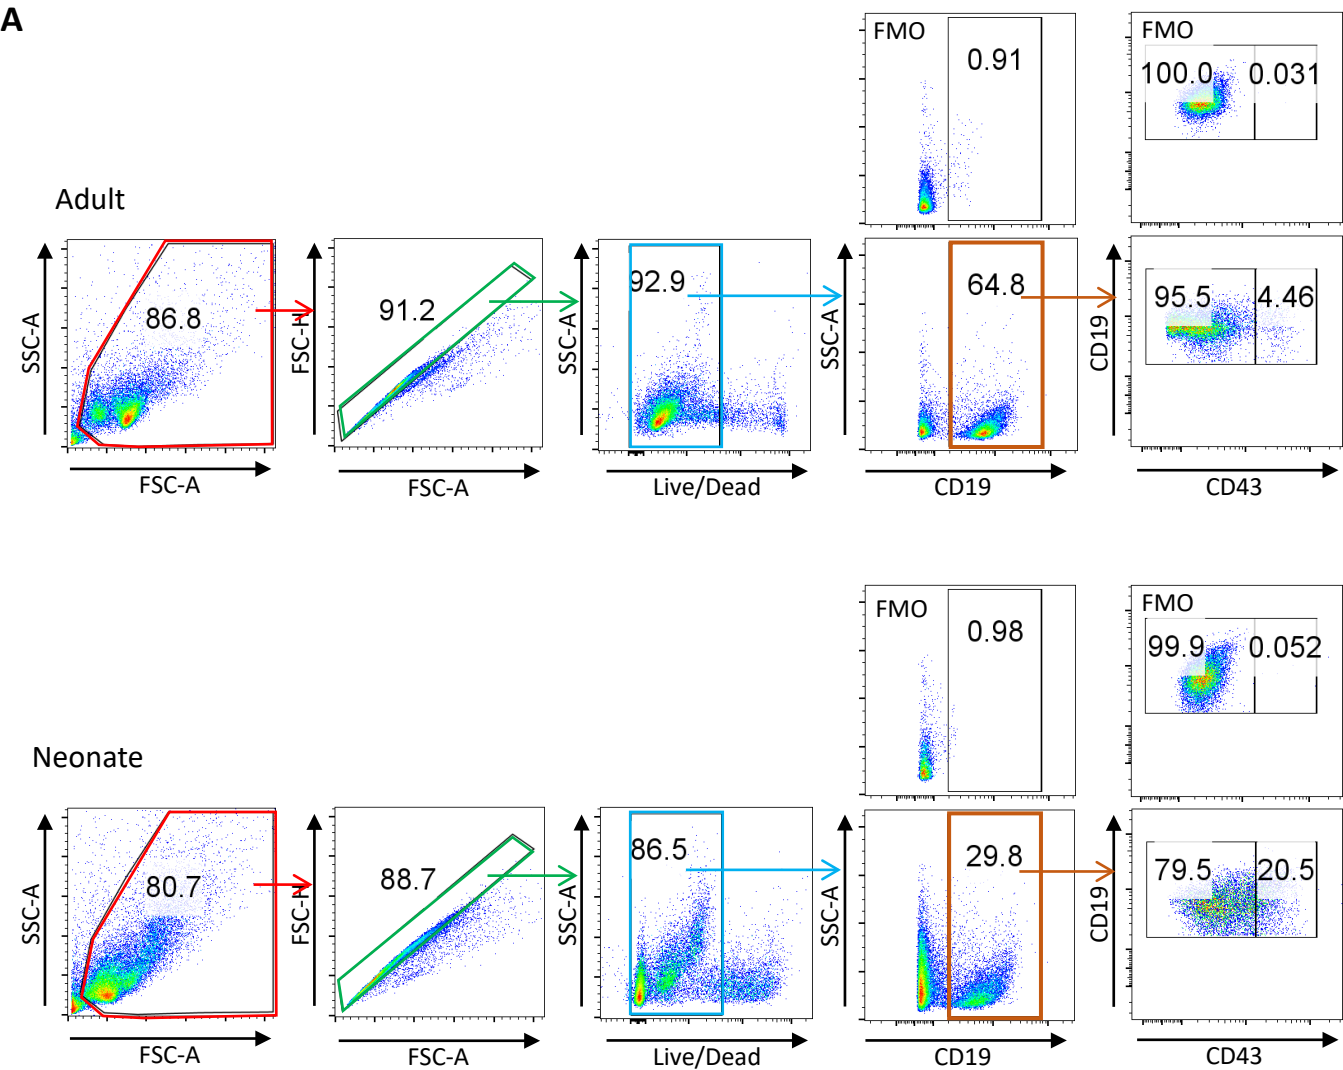

B

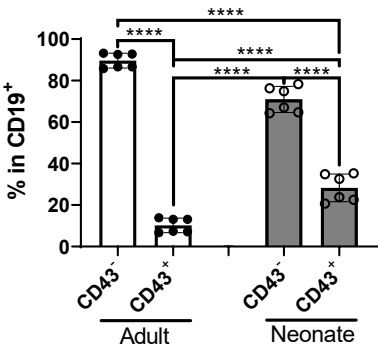

Supplement: supp [file elife-83561-supp-v1.zip]

Figure 3-figure supplement 1

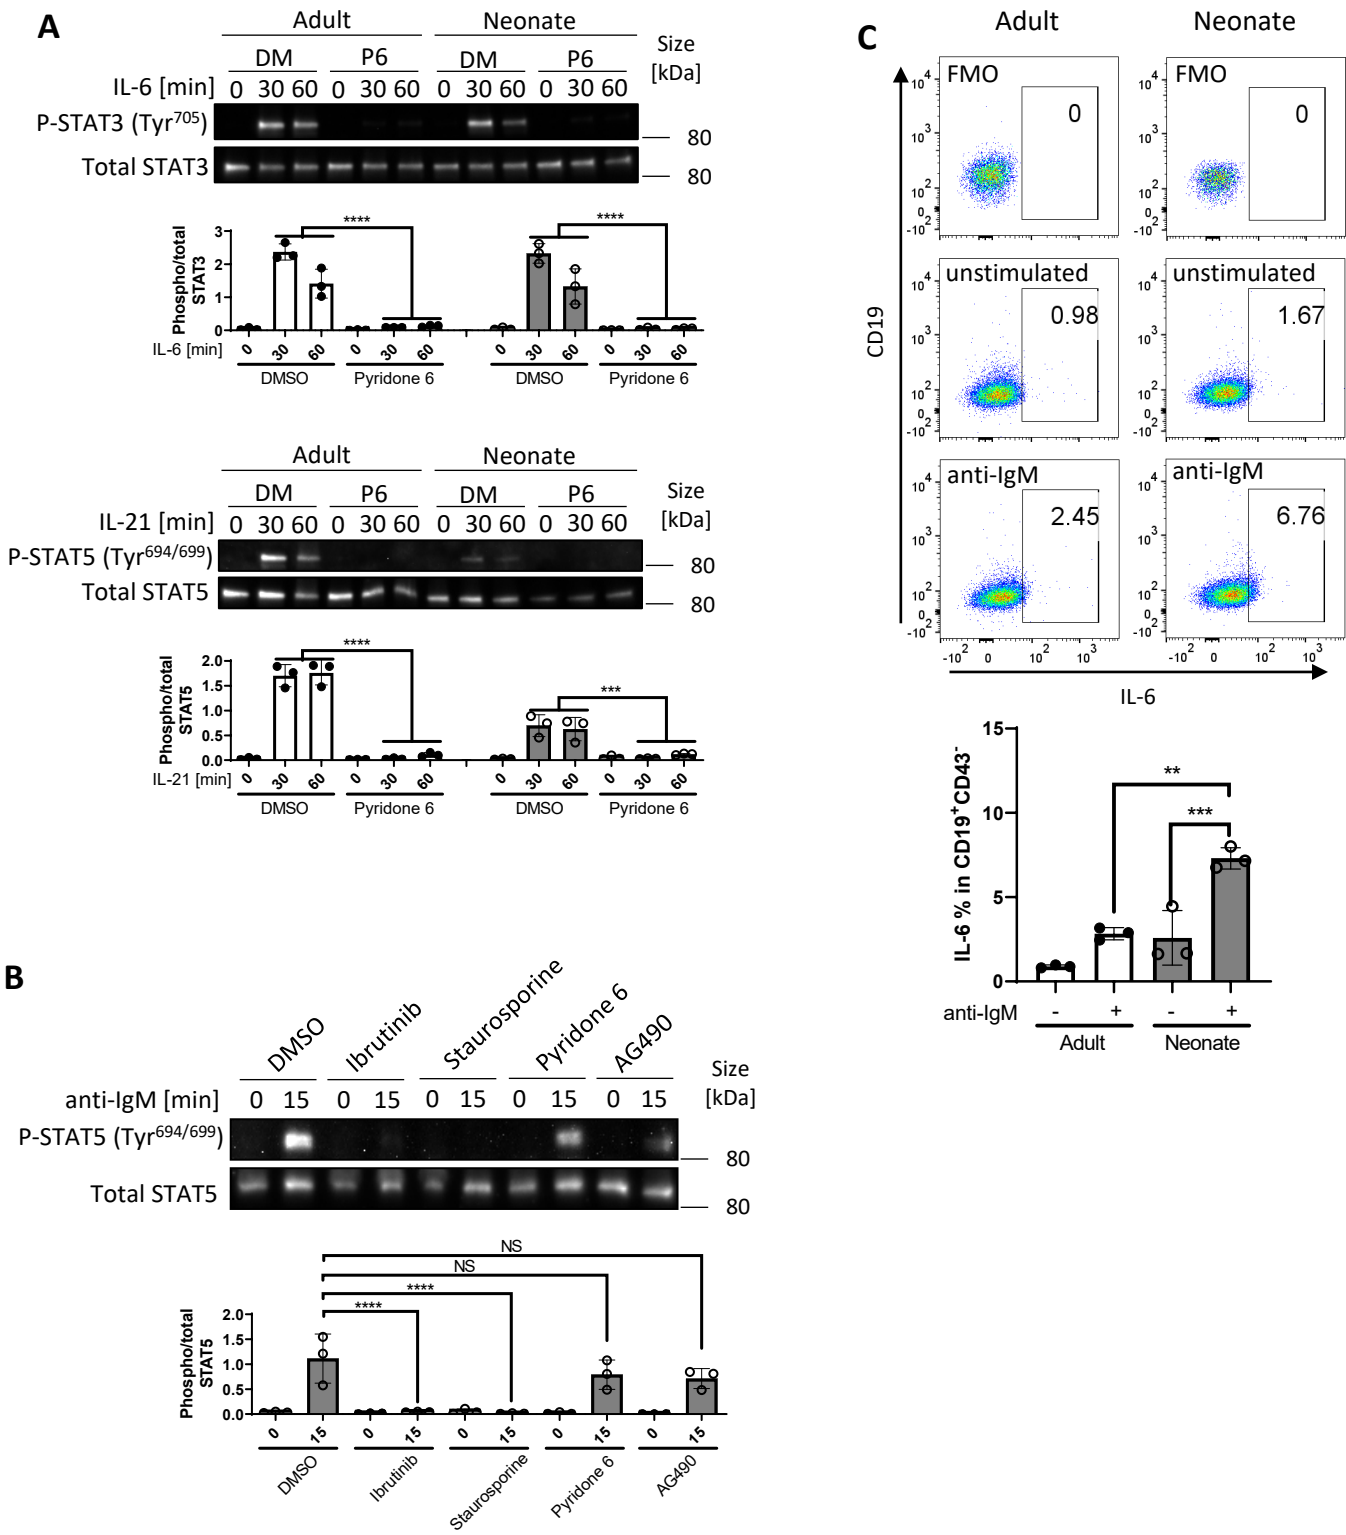

Supplement: supp [file elife-83561-supp-v1.zip]
